# Supplementary material for: Triggered insulin release studies of triply responsive supramolecular micelles
Source: Royal Society of Chemistry journal article supplement (doi:10.1039/c2py20380d), 2012-01-01
Supplement: c2py20380d.pdf [file c2py20380d.pdf]

# **Supporting information for: Triggered Insulin Release Studies of Triply Responsive Supramolecular Micelles**

Xian Jun Loh,<sup>‡</sup> Mei-Hsuan Tsai,<sup>‡</sup> Jesús del Barrio, Eric A. Appel, Tung-Chun Lee  
and Oren A. Scherman\*

*Melville Laboratory for Polymer Synthesis, Department of Chemistry, University of Cambridge,  
Cambridge CB2 1EW, United Kingdom.*

E-mail: oas23@cam.ac.uk

---

\*To whom correspondence should be addressed

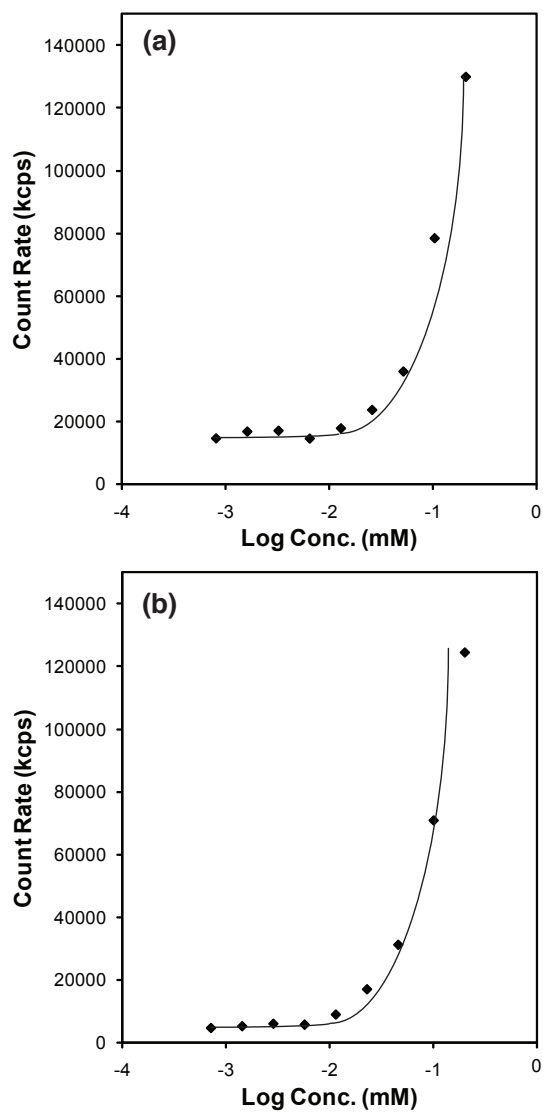

Figure 1: Variation in the count rate of the DLS measurement as a function of concentration. Concentration units in mM refers to the concentration of **1** + **2**  $\subset$  CB[8] ternary complex. **(a)** PAB-1; **(b)** PAB-2

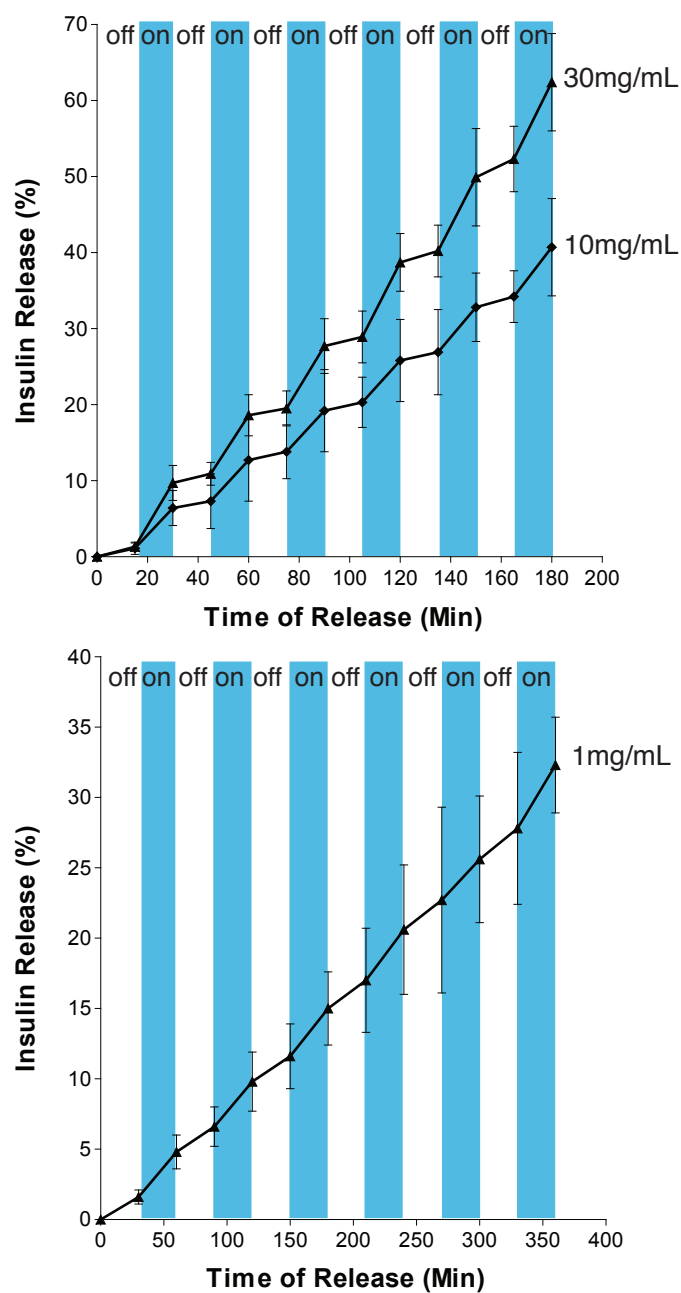

Figure 2: “ON-OFF” glucose triggered insulin release.

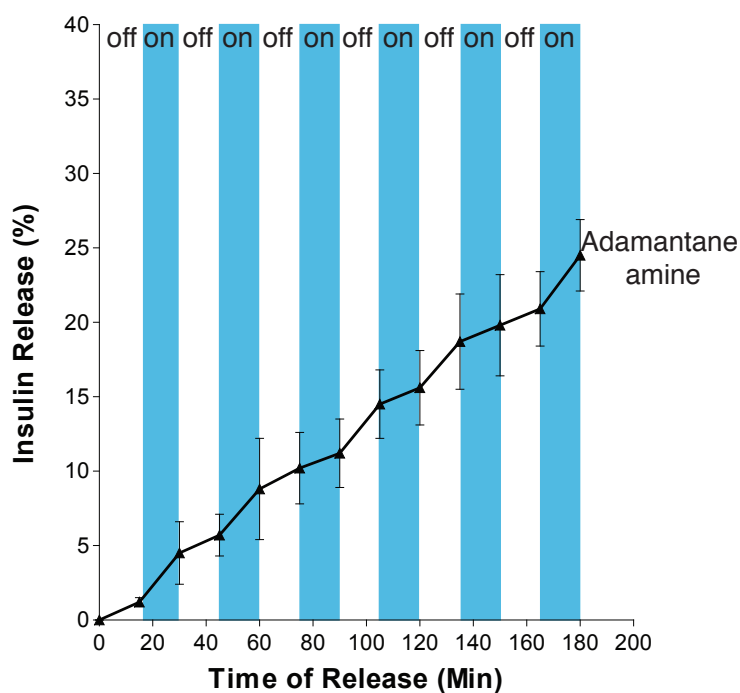

Figure 3: “ON-OFF” admantaneamine triggered insulin release.

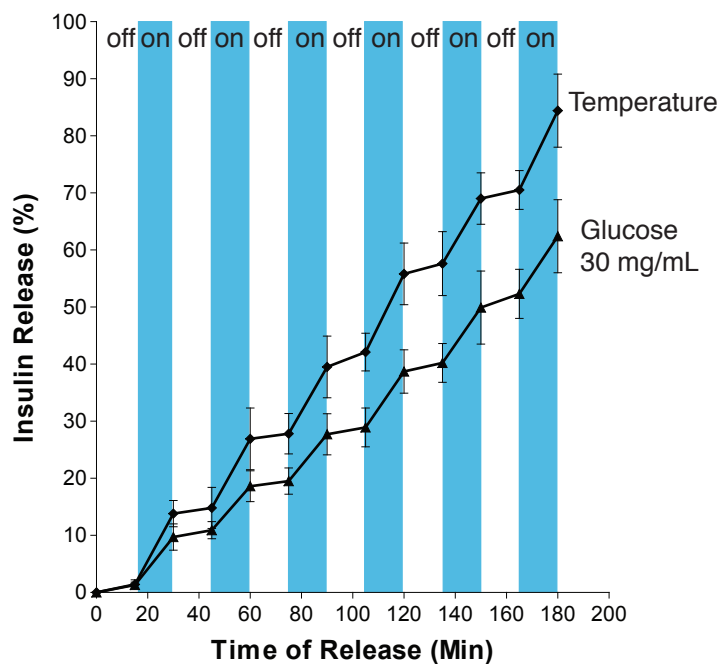

Figure 4: Comparison of the temperature and glucose triggered release

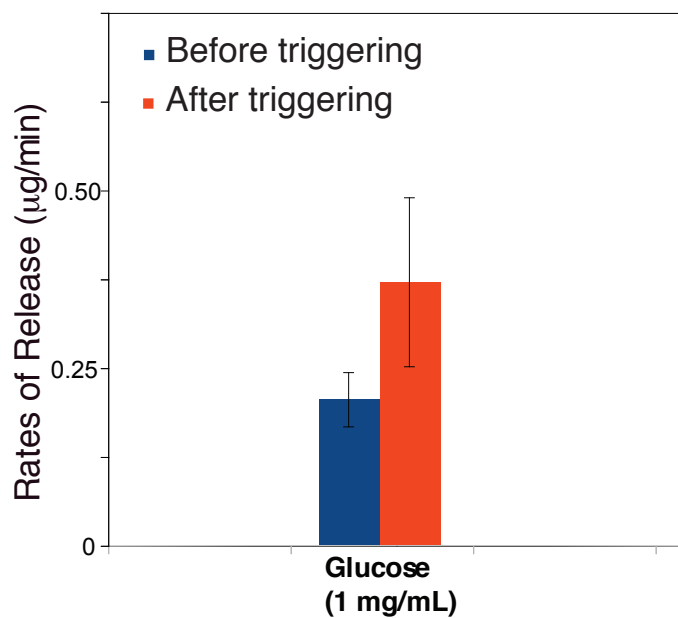

Figure 5: Comparison of with and without 1mg/mL glucose triggered insulin release
